# Supplementary material
Source: PubMed Central journal article supplement (PMC4475467)

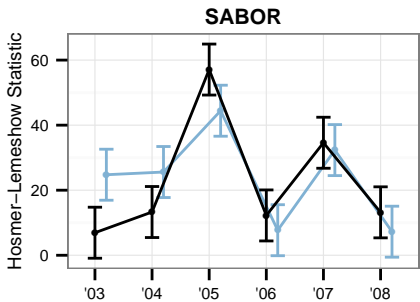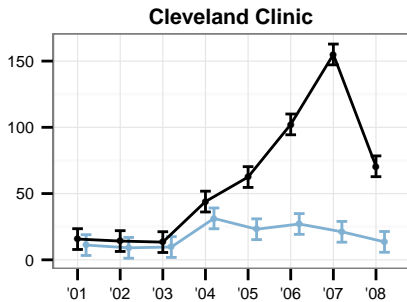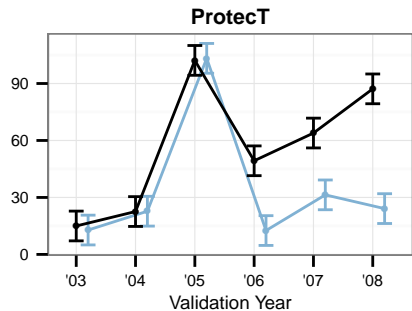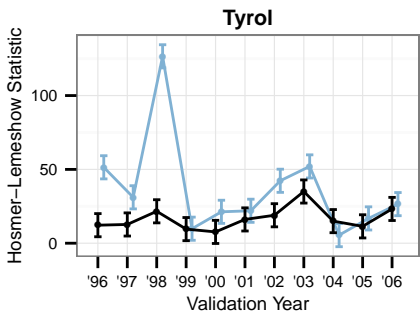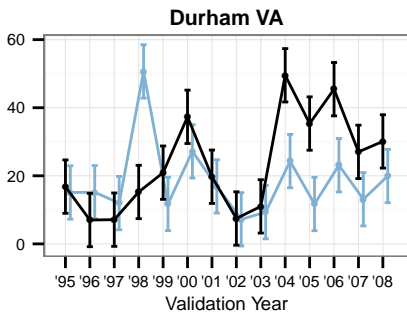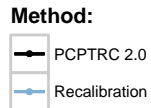

Supplement: NIHMS699312-supplement-1a.pdf [file NIHMS699312-supplement-1a.pdf]

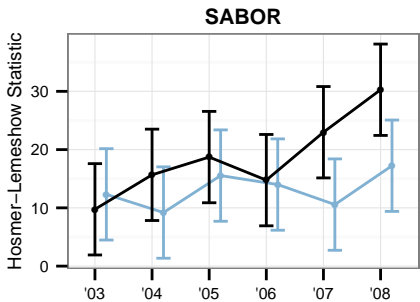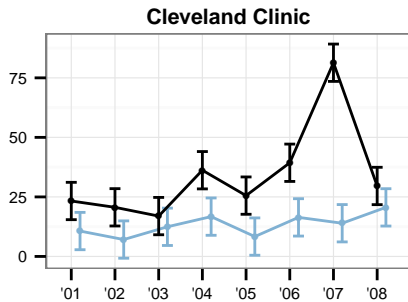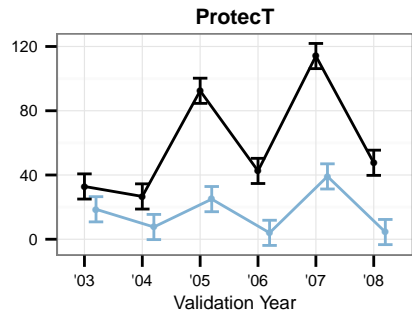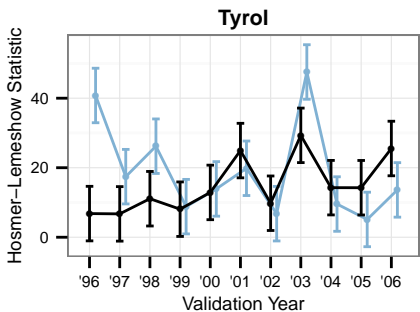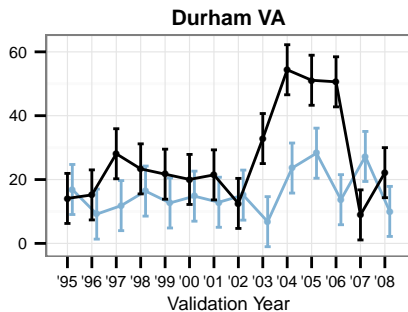

**Method:**

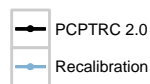

Supplement: NIHMS699312-supplement-1b.pdf [file NIHMS699312-supplement-1b.pdf]
